# 1 Ultra-Accurate Classification and Discovery of Functional Protein-Coding Genes 2 from Microbiomes Using FunGeneTyper: An Expandable Deep Learning-Based 3 Framework

4 Guoqing Zhang<sup>#1,2,3,4</sup>, Hui Wang<sup>#1,2,3</sup>, Zhiguo Zhang<sup>1,2,3</sup>, Lu Zhang<sup>1,2,3</sup>, Guibing Guo<sup>5</sup>,  
5 Jian Yang<sup>6,7</sup>, Fajie Yuan<sup>1,2,3,4\*</sup>, Feng Ju<sup>1,2,3,4,6,7\*</sup>

6 <sup>1</sup> Research Center for Industries of the Future, Westlake University, Hangzhou,  
7 Zhejiang 310030, China

8 <sup>2</sup> Center of Synthetic Biology and Integrated Bioengineering, Westlake University,  
9 Hangzhou, Zhejiang 310030, China

10 <sup>3</sup> Key Laboratory of Coastal Environment and Resources of Zhejiang Province,  
11 School of Engineering, Westlake University, Hangzhou, Zhejiang, 310030, China

12 <sup>4</sup> Institute of Advanced Technology, Westlake Institute for Advanced Study, 18  
13 Shilongshan Road, Hangzhou, Zhejiang 310024, China

14 <sup>5</sup> Software College, Northeastern University, Shenyang, China

15 <sup>6</sup> School of Life Sciences, Westlake University, Hangzhou, Zhejiang 310030, China.

16 <sup>7</sup> Westlake Laboratory of Life Sciences and Biomedicine, Hangzhou, Zhejiang  
17 310024, China

18 <sup>#</sup>The authors contributed equally to the work

19 <sup>\*</sup> Correspondence to

20 Dr. Feng Ju, Email: [jufeng@westlake.edu.cn](mailto:jufeng@westlake.edu.cn)

21 Dr. Fajie Yuan, Email: [yuanfajie@westlake.edu.cn](mailto:yuanfajie@westlake.edu.cn)

22 Address: Westlake University, 600 Dunyu Road, Hangzhou 310030, China

23 Tel.: 571-87963205 (lab), 571-87380995 (office), Fax: 0571-85271986

24

## 25    **Abstract**

26    High-throughput DNA sequencing technologies open the gate to tremendous  
 27    (meta)genomic data from yet-to-be-explored microbial dark matter. However,  
 28    accurately assigning protein functions to new gene sequences remains challenging. To  
 29    this end, we developed FunGeneTyper, an expandable deep learning-based framework  
 30    with models, structured databases and tools for ultra-accurate (>0.99) and fine-grained  
 31    classification and discovery of antibiotic resistance genes (ARGs) and virulence factor  
 32    or toxin genes. Specifically, this new framework achieves superior performance in  
 33    discovering new ARGs from human gut (accuracy: 0.8512; and F1-score: 0.6948),  
 34    wastewater (0.7273; 0.6072), and soil (0.8269; 0.5445) samples, beating the state-of-  
 35    the-art bioinformatics tools and protein sequence-based (F1-score: 0.0556-0.5065)  
 36    and domain-based (F1-score: 0.2630-0.5224) alignment approaches. We empowered  
 37    the generalized application of the framework by implementing a lightweight, privacy-  
 38    preserving and plug-and-play neural network module shareable among global  
 39    developers and users. The FunGeneTyper<sup>\*</sup> is released to promote the monitoring of  
 40    key functional genes and discovery of precious enzymatic resources from diverse  
 41    microbiomes.

42

43    **Keywords:** Functional classification, Protein-coding gene, Deep learning, Structured  
 44    database, Microbiome, Bioinformatics

45    \* The codes and database resources are available at: [https://github.com/emblab-](https://github.com/emblab-westlake/FunGeneTyper)  
 46    westlake/FunGeneTyper.

## 47    **Main**

48    High-throughput DNA sequencing and metagenomics have generated extensive  
 49    protein-coding gene (PCG) sequences from diverse environmental and human  
 50    microbiomes<sup>1-3</sup>. Accurate classification of genes into related protein functions is the  
 51    key to effective gene discovery. However, these datasets pose significant  
 52    computational challenges in metagenomic studies. Sequence alignment (SA),  
 53    implemented using NCBI's BLAST<sup>4</sup>, usearch<sup>5</sup>, and Diamond<sup>6</sup>, is commonly used for  
 54    functional annotation of PCGs<sup>7</sup>. To minimize false-positives, SA-based methods are  
 55    routinely conducted with strict user-defined cutoffs or thresholds (alignment identity,  
 56    coverage, and bit scores) to retain high-confidence best hits for each query sequence  
 57    from validated databases. This practice is widely implemented in the development of  
 58    tools for categorizing genes, including antibiotic resistance genes (ARGs)<sup>8,9</sup> and  
 59    virulence factor genes (VFGs)<sup>10</sup>. SA-based approaches effectively predict functions  
 60    between genes that share high homology (>80% identity<sup>8,9</sup>), but exclude distantly  
 61    homogeneous genes that fall below arbitrarily-defined and one-size-fits-all cutoffs  
 62    that may represent the majority of targeted functional genes in environmental samples  
 63    (e.g. core ARGs in activated sludge<sup>11</sup> and soil<sup>12</sup>). Therefore, these SA approaches with  
 64    stringent bioinformatic cutoffs unavoidably generate numerous false-negative results  
 65    and heavily underestimate true novelties and diversity of functional genes in largely  
 66    uncultured bacteria, thus biasing research outcomes or conclusions. Therefore, it is  
 67    crucial to develop intelligent and accurate classification paradigm and bioinformatic

68 tools to overcome limitations of existing SA-based classification approaches.  
69 Importantly, this endeavor will accelerate discovery of new genes in future  
70 metagenomic-based environmental and human microbiome studies<sup>13,14</sup>.

71 Hidden Markov models (HMM) with manual-crafted sequence alignments and  
72 scoring functions are powerful tools for protein domain-based functional gene  
73 annotation for detecting remote gene homologues with low sequence identity (< 30%)  
74 to known proteins<sup>15,16</sup>. However, these methods rely on token (amino acid) matching,  
75 which fail to detect high-level semantic representation similarity or structure-level  
76 representation similarity, leading to false-positives<sup>17</sup>, and thus cannot distinguish  
77 functions of proteins in the same family<sup>18</sup>. In contrast, deep learning (DL) methods  
78 excel at learning rich and high-level semantic representations when sufficient training  
79 data are available, and are effective at identifying proteins with structural and  
80 functional similarities<sup>19-22</sup>. Specifically, ground-breaking big language models initially  
81 developed for natural language processing tasks have been successfully applied to  
82 protein function prediction tasks<sup>23,24</sup>, often termed protein language models (PLMs).  
83 The high-level semantic representations learned from PLMs establish valid  
84 connections between sequences and function<sup>25,26</sup>. Notwithstanding the power of PLMs,  
85 gene classification tasks, particularly identifying fine-grained protein function  
86 subclasses, pose challenges for data-hungry deep learning paradigms because of  
87 limited supervised training dataset for certain genes. Additionally, it remains unclear  
88 whether advanced PLMs perform better than state-of-the-art metagenomic

89 bioinformatics tools at microbiome gene classification and discovery.

90       Here, we propose FunGeneTyper, a PLM-based deep-learning framework for  
 91 accurate and expandable prediction of PCG function. FunGeneTyper implements a  
 92 two-stage pipeline that separately handles the assignment of the main types and  
 93 subtypes of PCG functional classes, reducing issues associated with insufficient  
 94 training data during subtype-level predictions. To improve conciseness, it first  
 95 performs standard classification of genes of the main types and then performs fine-  
 96 grained retrieval by comparing similarities between learned protein subtype  
 97 representations. FunGeneTyper models classify ARGs with ultra-high accuracy ( $>0.99$ )  
 98 and outperforms the state-of-the-art SA and HMM-based methods and tools.  
 99 Furthermore, we also demonstrate the generalized application of FunGeneTyper  
 100 models in ultra-high classification of VFGs and introduce the adapter module, a  
 101 lightweight neural network that can be inserted into the current backbone architecture  
 102 to realize parameter-efficient training. The adapter-tuning-based FunGeneTyper  
 103 models are expandable to the classification of various categories of genes and enables  
 104 sharing of both task-agnostic and task-specific parameters without accessing the  
 105 private training dataset. Thus, FunGeneTyper offers a unified and innovative way of  
 106 integrating the global efforts of the microbiome and bioinformatics communities,  
 107 endowing the FunGeneTyper framework with the ability to conduct unlimited  
 108 prediction of functional gene categories beyond the ARGs and VFGs demonstrated  
 109 here, which is key to accelerating the global discovery of new and precious genetic

110 and enzymatic resources from microbiomes.

## 111 **Results**

### 112 **FunGeneTyper framework, structured database, and deep learning models**

113 FunGeneTyper is the first unified framework that utilizes DL models and structured  
114 functional gene datasets (SFGD) to develop new DL-based classifiers for any gene  
115 category via transfer learning. This novel framework achieves highly accurate PCG  
116 classification from metagenomic studies and extends the models to efficiently predict  
117 broad categories of gene functions from large varieties of microbiomes with  
118 corresponding customizable SFGD.

#### 119 *Structured functional gene datasets*

120 We deployed a transferable strategy to collect high-quality reference gene sequences  
121 to meet FunGeneTyper's training requirements with high reliability (Fig. 1a).  
122 Experimentally-confirmed reference sequences of target genes from literature and/or  
123 expert-curated databases were used as the core dataset, and highly homologous  
124 protein sequences (at least 80% identity and 80% coverage) were extracted from  
125 Uniref100 database and used as the expanded functional genes dataset. A non-target  
126 sequence dataset was selected from Swiss-Prot database (version: June 2021) by  
127 excluding perfect matches to the target genes, and used as the negative training set so  
128 that FunGeneTyper could learn sufficient features of non-target genes. Core and  
129 expanded functional gene datasets and the non-target dataset were integrated to form

the SFGD, which was organized hierarchically into a secondary structure based on gene ontology. The SFGD was divided into training, validation, and testing sets (ratio 6:2:2) and used to train the following two DL models.

### *Deep learning models*

The framework has a top-down protein function prediction workflow featuring two DL models (Fig. 1b), FunTrans and FunRep, which progressively classify protein sequences from the upper (type) to lower (subtype) functional levels. FunGeneTyper was pre-trained on ESM-1b, a large-scale pre-trained protein sequence model based on the transformer architecture released by Facebook<sup>22</sup>. ESM-1b is composed of the 33-layer transformer architecture consisting of 650 million parameters trained on Uniref50. It has the superior capacity to infer fundamental structural and functional characteristics of proteins from sequences that can significantly increase the performance metrics for sequence-function tasks. Despite sharing the 33-layer transformer architecture, FunTrans and FunRep were independently constructed, trained, and optimized, to complete two-level functional classification tasks that successively assigned a PCG to its best matches of functional type and subtype in a structured database, respectively.

FunTrans distinguishes protein sequences and classify them into specific functional types equivalent to gene families with the same or similar functions. It is inspired by the fact that proteins with similar structures and functions clustered closer together in the embedding space. The main FunTrans structure is a 33-layer transformer that

151 implements initial classification of input data (Fig. 1c). Adapter modules are inserted  
 152 into each transformer block as trainable parameters. The adapter enables efficient  
 153 fine-tuning of parameters for different gene classification tasks. High parameter  
 154 sharing is achieved under the premise that the parameters of the original network  
 155 remain unchanged. Adapter modules enable flexible and parameter-efficient transfer  
 156 learning and prevent overfitting<sup>27,28</sup>. FunTrans adds a nonlinear classification layer at  
 157 the end of the sequence semantic representation for functional classification.

158 FunRep has a structure similar to that of FunTrans and can be used to embed  
 159 representation retrieval for further subtype classification of protein function (Fig. 1d).  
 160 It uses embedding representation retrieval to accurately predict functional subtypes of  
 161 the FunTrans output results for classification. FunRep also adds an adapter layer to  
 162 increase robustness and insight into a broader range of gene classification.

### 163 **FunGeneTyper classification performance and learning ability**

164 The spread of antibiotic resistance has raised public health concerns globally<sup>29</sup>.  
 165 Reliable ARG model classification is important for surveillance and control of the  
 166 spread of antibiotic resistance, and achieving sufficient model sensitivity to remote  
 167 homologues is key to discovering new ARGs. Therefore, we first classified ARGs and  
 168 demonstrated the ability of the FunGeneTyper framework to achieve this goal. Before  
 169 building the ARGs classification models, we constructed a hierarchical structured  
 170 ARG database (SARD) based on antibiotic resistance ontology of the comprehensive  
 171 antibiotic resistance database (CARD)<sup>7</sup>. Based on CARD's ontological rules, ARGs



172 were assigned to class and group hierarchies based on the types of drugs to which  
 173 they confer resistance, and the subtypes of genes with the same resistance function,  
 174 respectively (Dataset S1). To test and improve the sensitivity of the model, we used  
 175 different identity thresholds to collect four non-target sequence sets from Swiss-Prot  
 176 database —excluding ARGs — as negative training datasets, for model training  
 177 (Supplementary Figure 1, see Methods). The addition of a negative training set allows  
 178 the model to learn features of non-targeted genes, which gives the model the ability to  
 179 directly classify targeted (e.g., ARGs) and non-targeted genes (e.g., non-ARGs) from  
 180 new datasets to be tested. We evaluated the impact of four identity thresholds of the  
 181 negative datasets on the learning features of the model. The results of five-fold cross-  
 182 validation revealed that the model with 0% identity as the threshold for recruiting  
 183 non-target sequences had the best performance metrics, including accuracy, recall,  
 184 precision, and F1-score (Fig. 2a). Under these optimized conditions, the positive  
 185 SARD set contained 61874 ARG sequences, including 2972 experimentally-  
 186 confirmed core sequences inherited from the CARD and 58902 homology-predicted  
 187 (>80% identity and >80% coverage) expanded ARG sequences from Uniref100. All  
 188 ARG reference sequences were hierarchically assigned to 19 classes and 2972 groups  
 189 (Dataset S2 and Supplementary Figure 2).

190 To demonstrate the powerful utility of FunGeneTyper, we used the reference  
 191 protein sequences in SARD to train two transformer models (FunTrans and FunRep)  
 192 and developed them as a new deep-learning ARGTyper deep-learning classifier. We

193 used the trained ARGTyper to classify the testing set to validate the performance of  
 194 the ARGTyper. The overall ARGTyper performance metrics prove that FunGeneTyper  
 195 provides an excellent and robust framework for gene classification. Specifically, the  
 196 optimal FunTrans model at the ARG class level reached an accuracy of 0.9979, a  
 197 precision of 0.9830, a recall rate of 0.9683, and an F1 score of 0.9756 (Fig. 2b).  
 198 Moreover, the prediction precision and recall of all 17 ARG classes exceeded 0.96  
 199 (Fig. 2c), apart from fusidic acid and triclosan, which showed lower precision and  
 200 recall because they have only 21 and 53 reference sequences, respectively, in SARD  
 201 (Dataset S3). More training data helps the model learn more features. Nonetheless, the  
 202 power of FunTrans to classify these temporarily less-represented classes of ARGs will  
 203 improve as more functionally-verified sequences will be available for model training.

204 The vector space generated by FunGeneTyper was semantically rich and encoded  
 205 structural, evolutionary, and functional information. To explain what our model  
 206 intuitively learns, we obtained representations of all classes of ARG and non-ARG  
 207 sequences in the training set. We used uniform manifold approximation and projection  
 208 (UMAP) to reduce data dimensions in each layer to two. Visualizations performed in  
 209 the four essential representative layers (1st, 5th, 32nd, and 33<sup>rd</sup>) revealed the learning  
 210 process of the model (Fig. 2d). All ARG sequences were highly entangled at the first  
 211 level of encoding input. However, they became increasingly separated as the  
 212 transformer model got deeper. Each type of ARG undergoes a process from dispersion  
 213 to aggregation. This finding verified that FunTrans can efficiently learn the

214 representation features of sequences from raw input data with high entanglement.

215 Prediction multiclass confusion matrix was used to represent the effect of  
 216 FunTrans on the learning features of each ARG class. The results indicated that the  
 217 FunTrans model was excellent at predicting all ARG classes (Fig. 2e). We continued  
 218 to locate significant classification errors in the ARG classes using error detection  
 219 counts (Fig. 2f). Prediction error was concentrated in the multidrug class. Specifically,  
 220 33 non-ARG sequences were mispredicted as multidrug resistance, whereas 39  
 221 multidrug resistance protein sequences were mispredicted as non-ARG sequences.  
 222 The poor prediction performance of these proteins is mainly due to their high  
 223 structural differences and diverse biological functions that include roles other than  
 224 multidrug resistance<sup>30</sup>, making it challenging for a DL model to effectively learn  
 225 sufficient discriminative features in the absence of sufficient training data. Multidrug  
 226 efflux pumps<sup>30</sup> export antibiotics and other diverse extraneous substrates, including  
 227 organic solvents, toxic heavy metals, and antimicrobials, and also fulfill other key  
 228 biological functions such as biofilm formation, quorum sensing and survival and  
 229 pathogenicity of bacteria<sup>30</sup>. Therefore, multidrug resistance proteins or efflux pumps  
 230 were not seriously considered as ARGs<sup>17,31</sup> and we recommend excluding their  
 231 sequences from ARG analysis unless they can be reliably or unambiguously assigned  
 232 to resistance functions of certain antibiotic classes.

233 Once the FunTrans model was shown to be robust and accurate in identifying  
 234 ARGs and classifying them into 19 classes, we trained FunRep, which conducted a

more detailed lower-level classification of ARGs into 2972 groups (Dataset S3). FunRep achieved an overall prediction accuracy of 0.9023 for all ARG groups (Dataset S4). We used UMAP to visualize FunRep model's learning process. UMAP was used to visualize the characteristics of the final layer of all classes except the Fusidic acid class (21 sequences, Dataset S3). UMAP showed that FunRep can cluster the features of each group in the main ARG classes, including beta-lactams (5909 sequences), Macrolides-Lincosamides-Streptogramins (MLS, 2317 sequences), aminoglycosides (3483 sequences), and glycopeptides (2037 sequences) (Supplementary Figure 3).

In summary, we demonstrated the application of the FunGeneTyper framework to develop ARGTyper as the first transformer-based ARG classifier trained from a customized structured ARG database (SARD). The performance metrics of the testing set show that FunTrans and FunRep can achieve highly accurate (accuracy=0.998) and robust (F1-score=0.976) identification of all known types (classes) and subtypes (groups) of ARGs in the authoritative CARD. Both the accuracy and robustness of FunGeneTyper models outperform previously published results from DeepARG (accuracy>0.97, F1-score>0.93<sup>9</sup>) and HMD-ARG (accuracy=0.935, F1-score=0.893<sup>32</sup>) on their own testing sets of ARGs.

### Model performance in the discovery of new genes

The 'twilight zone' of protein sequence alignment is a complex, long-standing problem plaguing protein function prediction<sup>33,34</sup>, limiting the discovery of PCGs in

the largely uncultured microbial world. In contrast to classic SA-based tools, DL-based models (FunRep and FunTrans) of the FunGeneTyper framework are designed with unique features and intrinsic advantages for predicting remote homologues of protein sequences with guaranteed accuracy and robustness, as previously demonstrated for ARG classification.

To compare FunGeneTyper's ability to identify new PCGs with those of existing methodologies, we evaluated its ability of its DL-based models to discover remote homologues by predicting experimentally-confirmed protein sequences of new ARGs discovered from three representative habitats: human gut ( $n = 168$ )<sup>35</sup>, wastewater treatment plants ( $n = 77$ )<sup>11</sup>, and soil ( $n = 52$ )<sup>36-39</sup>. We computed the predictive performance of FunGeneTyper classifier for ARGs (ARGTyper) and compared it with that of three state-of-the-art tools: DL-based tools (HMD-ARG<sup>32</sup> and DeepARG<sup>9</sup>), SA-based tools (RGI<sup>7</sup>), and HMM-based tools (Resfams<sup>18</sup>) (Table 1). FunGeneTyper had higher accuracy, precision, recall, and F1-score for predicting new ARGs compared with HMD-ARG<sup>32</sup> and DeepARG<sup>9</sup>. The significant improvement was primarily attributed to our implementation of the protein semantic models (i.e., FunTrans and FunRep) in FunGeneTyper, which can learn more hidden features of protein sequences, especially the context information<sup>19,21</sup>, compared with the traditional one-hot encoding algorithm and the convolutional neural network used by HMD-ARG<sup>32</sup> and the multilayer perceptron used by DeepARG<sup>9</sup>. Moreover, the overall classification performance of FunGeneTyper, as benchmarked by the F1-score

(0.5445 to 0.6948), was much higher than that of the classic SA-based methods (0.0556 to 0.6598) and HMM-based methods (0.2630 to 0.5224) (Table 1). Although RGI also achieved high accuracy (0.8830) in human intestinal data, its precision (0.4545), recall (0.3968), and F1-score (0.4195) were much lower than those of the FunTrans model (0.7500, 0.6642, and 0.6948, respectively) because many of the new ARG sequences tested here fell below the commonly applied stringent identity cutoffs ( $> 95\%$  RGI). It is expected that when a strict one-size-fits-all filter cutoff is applied to the alignment results, many false-negatives would result, limiting the discovery of ARGs that show a more remote homology to database sequences. The superior performance of the FunGeneTyper classifier over existing tools in identifying new ARGs was further evident when comparative tests were performed using wastewater treatment plant (WWTP) or soil samples compared with human gut samples (Table 1). This indicates that FunGeneTyper has a greater capacity to predict functional genes in complex environmental samples. To further resolve the superior predictive performance of FunGeneTyper for remote homologues of functional genes over existing tools, we divided the ARGs data into lower homology ( $\leq 50\%$  identity) and higher homology ( $\geq 50\%$  identity) datasets (Supplementary Figure 4). FunGeneTyper not only consistently achieved better classification performance of higher homology ARGs in all three sample groups (WWTP, soil, and human gut), it also showed outstanding performance at accurately and sensitively predicting the function of remote homologous sequences (Dataset S5).

298 Taken together, our results exemplify the discovery and classification of novel  
 299 ARGs, especially among relatively remote homologues (<50% identity), and  
 300 demonstrate that FunGeneTyper is best at predicting new ARG protein sequences,  
 301 exhibiting unprecedented capacity to identify new genes with high accuracy,  
 302 sensitivity, and robustness.

### 303 **Evaluating the generalizability of FunGeneTyper**

304 To demonstrate the generalizability of FunTrans and FunRep in classifying other gene  
 305 categories, we trained the models using a calibrated and professionally expanded  
 306 bacterial virulence factor database, VFNet<sup>40</sup> and utilized them to develop a new  
 307 transformer-based classifier of virulence factor gene (VFG), named VFGTyper.  
 308 Before training the model, we built a two-level expert-curated structured database  
 309 based on the virulence ontology and reference sequences in the VFNet database.  
 310 Semantic and categorically ambiguous data were cleaned (Methods). The final  
 311 structured virulence factor database (SVFD) consisted of 160484 VFG sequences  
 312 distributed into 2837 classes in 45 families (Dataset S6).

313 We followed a strategy similar to that mentioned above to train the model,  
 314 collecting a non-target dataset with 551,783 sequences (excluding VFGs) from Swiss-  
 315 Prot, as the negative dataset (see Methods). With the merit of the proposed adapter  
 316 module, we only need to re-train a new adapter when building a VFGTyper. The  
 317 design of adapter allows us to train only a new classifier and an adapter when  
 318 predicting new functions. All the parameters in the backbone network can be reused.

Therefore, VFGTyper can be regarded as a new task branch in the FunGeneTyper framework, where only the adapter and classifier differ. We verified the VFGTyper using the testing set to provide evidence of its generalizability in the functional genotyping process. VFGTyper achieved an accuracy of 0.9907 (Fig. 3a) in the family level prediction task. The obfuscation matrix results also showed that FunTrans achieved excellent classification performance for each VFG at the family level (Fig. 3b, Supplementary Figure 5). In addition, FunRep was 0.9499 accurate at predicting different VFG classes in the second-stage prediction.

In conclusion, we demonstrated that FunGeneTyper can be successfully generalized to develop VFGTyper as the first transformer-based VFG classifier of its kind and applied the new classifier to achieve ultra-accurate classification of VFGs by adding new adapters. To vividly show that FunGeneTyper can learn sufficient discriminative features from different groups of functional gene datasets, we visualized the learning process of FunTrans and FunRep models for VFG sequences. Consistent with the learning process for ARGs (Fig. 2d), both models also achieved effective feature clustering and classification of VFGs at both the family (Fig. 3c) and class (Supplementary Figure 6) levels. Besides classification performance, we also proved VFGTyper's full capability in the discovery of an experimentally-confirmed novel VFG (NCBI accession no.: WP\_034687872.1) of a toxin family in *Chryseobacterium piperi* with sequence similarity to botulinum neurotoxins (BoNTs) through re-analysis of published genome<sup>41</sup>. Specifically, of the 8 putative toxin genes



340 of *C. piperi* showing no significant (n=6) or only limited (n=2) sequence homology  
 341 (i.e., global identity < 10%) to known reference VFGs, 7 were effectively identified as  
 342 VFGs by FunGeneTyper and 4 were further classified as BoNTs (Dataset S7).  
 343 Compared with a conventional sequence alignment (SA)-based approach which failed  
 344 to predict 6 VFGs, the deep learning models of FunGeneTyper showed much greater  
 345 capacity for the discovery of remote homologues of known toxin genes. Therefore,  
 346 FunGeneTyper represents an expandable deep learning-based framework for ultra-  
 347 accurate classification and discovery of functional genes, as demonstrated here for  
 348 ARGs and VFGs.

### 349 **Privacy-preserving global sharing of plug-and-play adapters for functional gene** 350 **discovery**

351 To demonstrate the parameter efficiency of FunGeneTyper's adapter modules, all 650  
 352 million parameters of the pre-trained model are fine-tuned as a benchmark test which  
 353 achieved excellent prediction accuracy in ARGs class (0.9988) and VFGs family  
 354 (0.9930). Comparatively, with only fine-tuning of about 21 million parameters (3% of  
 355 all parameters) of the Adapter layer, we demonstrated that FunGeneTyper achieved  
 356 near-identical excellent performance of 0.9979 for ARGs class and 0.9907 for VFGs  
 357 family, proving that parameter-efficient lightweight plug-and-play adapter modules of  
 358 FunGeneTyper can be easily shared without little loss of prediction accuracy.

359 Benefiting from the parameter-efficient property, FunGeneTyper has two novel  
 360 merits. First, FunGeneTyper enables effective effort-sharing by the entire community

(Fig. 4). Specifically, a researcher who has trained our FunGeneTyper model for classification or discovery of functional genes (other than ARGs and VFGs demonstrated here) can submit their adapters (along with a classification layer) to the adapter hub. Once the adapter has been submitted, the module can be downloaded and easily inserted into the FunGeneTyper model for direct downstream user application. Second, the adapter design helps solve data privacy issues. Where researchers have not publicly released their own datasets, they can train FunGeneTyper with their private datasets, submit only the adapter module (again along with a classification layer), and provide functional descriptions of their FunGeneTyper. Thus, the private datasets are protected, while the uploaded adapter models can be used without model training. As the number of researchers getting involved in the development of FunGeneTyper increases, the model may become a universal toolkit that can be used for predicting functional genes simply by looking up related functional modules. We believe that with the elegant adapter module, FunGeneTyper will facilitate adapter sharing and model integration globally.

## **Discussion**

Metagenomics has provided an opportunity for identifying microbiome diversity and novel functionalities. However, the speed at which high-throughput DNA sequencing technologies unravel the vast genetic novelties of uncultured microbes in nature outpaces our capacity to understand their function. Previous approaches for functional

381 classification of PCGs were based on sequence alignment using tools such as BLAST<sup>4</sup>,  
 382 usearch<sup>5</sup>, and Diamond<sup>6</sup> or conserved motifs and domains using Hidden Markov  
 383 Models. Selection of uniform cutoffs and thresholds usually limit the accuracy and/or  
 384 sensitivity of these methods for functional gene prediction. Protein semantic  
 385 algorithms based on NLP methods have been developed <sup>20,24</sup>. However, these  
 386 algorithms are not optimized for classifying different categories of microbial genes,  
 387 and a unified thinking paradigm is required to meet the needs for accelerated  
 388 discovery of new genes.

389 Our study provides an expandable deep learning-based framework for efficient  
 390 and robust gene function prediction, which represents an emerging methodological  
 391 paradigm for global developers and users to tackle unprecedented challenges and  
 392 meet the above-mentioned urgent needs in the classification and discovery of any  
 393 group of functional PCGs. We propose an end-to-end FunGeneTyper framework for  
 394 the classification prediction of gene functions. We exemplify the framework by  
 395 developing two transformer-based classifiers, ARGTyper and VFGTyper, based on  
 396 deep learning models coupled with expert-curated structured databases (SARD and  
 397 SVFD) to realize robust functional classification of bacterial ARGs and VFGs, which  
 398 are two categories of genes key to WHO's one health approach for human, animal,  
 399 and environmental health protection<sup>42</sup>.

400 A series of experimental validations, including five-fold cross-validation, testing  
 401 set validation, and experimentally-confirmed protein sequence validation,

demonstrate the effectiveness and robustness of FunGeneTyper. Using ARG as an example, FunGeneTyper models are more effective than SA-based and DL-based models in predicting protein sequences of new ARGs from the human gut, WWTP, and soil microbiomes with relatively low homology ( $< 50\%$  similarity) to known ARGs. This shows that ARGTyper has an unmatched advantage in discovering ARGs, primarily because of the powerful learning ability of protein semantic models. Since experimentally-confirmed sequences of the major categories, types, and subtypes of genes are not sufficient, expanding the database based on sequence homology is common and necessary to obtain sufficient training sequence data. UMAP analysis showed that the expanded sequences represent reliable datasets and support our model to better learn discriminative protein semantic features to achieve satisfactory performance in identifying functional genes, including ARGs and VFGs.

Accurately classifying target genes from the huge interference of non-target gene data is a problem. Therefore, we purposefully introduced non-functional genetic datasets as part of the training set. Although this operation increases training complexity, it enables our model to accurately classify target genes from noisy data when used to analyze large-scale metagenomic sequence datasets from environmental or animal microbiome samples. Some machine learning methods rely on sequence alignment tools to create a similarity score matrix of potential gene sequences and databases<sup>9,43</sup>. Such practices will inevitably be affected (and limited) by the selection of arbitrary thresholds for the results. The FunGeneTyper framework proposed here

423 can accurately annotate genes via classification through discriminative features  
 424 learned from multiple sequences. The limited number of training sequences may  
 425 prevent the models from learning sufficient features. This transient issue would,  
 426 however, be easily solved once more experimentally-confirmed reference protein  
 427 sequences of target genes are available for model retraining and refinement.  
 428 Meanwhile, the robustness of deep learning to noise labels<sup>44</sup> can also help our  
 429 framework models and classifiers outperform existing ones in discovering new genes.

430 In particular, once large amounts of (meta)genomic data are freely available, a  
 431 uniform and convenient understanding of the relationship between microbial gene  
 432 sequences and protein function becomes a perennial challenge that can be tackled to  
 433 create opportunities for gene discovery. There are other gene categories, apart from  
 434 ARGs and VFGs, including those associated with microbially-driven global  
 435 biogeochemical cycling (carbon, nitrogen, phosphorus, and sulfur) or microbial  
 436 biodegradation (bioremediation and bio-restoration) and biosynthesis (biomedicine  
 437 and bioresources) (Fig. 5), such as those well established by the RDP's FunGene  
 438 database<sup>45</sup>. Building a dynamic metagenomic bioinformatics community will help us  
 439 better understand gene function. In principle, FunGeneTyper can predict the function  
 440 of any gene category based on prior parameters of the pre-trained model and the  
 441 adapter's transfer-learning ability. The adapter module used in FunGeneTyper is a  
 442 lightweight plug-and-play neural network that only fine-tunes and maintains a small  
 443 set of parameters and is conducive for sharing and promotion. Therefore, other

researchers can use the framework and training parameters we provide to train their own core datasets to easily develop predictive deep learning models of genes of interest. Researchers can also share a trained adapter through the adapter sharing community (ASC) without disclosing their private datasets. The future prosperity and collaboration of the ASC under the guidance of FunGeneTyper framework provide an interactive, dynamic, and continuously improving or evolving platform for functional classification of various PCG sequences. More importantly, FunGeneTyper and ASC are expected to contribute significantly to advances in industrial biotechnology, health and medicine, food and agriculture, environmental biotechnology, and bioenergy (Fig. 5), as they are increasingly applied to accelerate the discovery of new genes and enzymatic resources from microbiomes.

In conclusion, FunGeneTyper provides an innovative and unified framework with deep learning models (i.e., FunTrans and FunRep), expandable classifier toolkits (e.g., ARGTyper and VFGTyper) and customizable structured databases for the ultra-accurate classification and discovery of functional genes (e.g., ARGs and VFGs) that have scientific and biotechnological significance. This framework will contribute to the robust monitoring of function genes and discovery of novel enzymatic resources from diverse microbiomes and uncultured microbes therein, which is critical to understand and harness the microbiome sciences underlying environment (biogeochemistry, bio-restoration, and bioremediation)<sup>14</sup> bioeconomy (bioenergy and bioresources)<sup>13</sup>, and human systems (food and health)<sup>20,46</sup>.

## 465     **Methods**

### 466     **Collection and expansion of the core dataset**

467     The core dataset used for FunGeneTyper model training is a set of experimentally-  
 468     confirmed reference sequences of target functional genes collected from literature  
 469     and/or expert-curated databases. Because the core dataset does not always contain a  
 470     sufficient number of experimentally-confirmed sequences (no more than 10  
 471     sequences<sup>40</sup>) for every type or subtype of functional gene, it is expanded to retrieve  
 472     more sequence data to improve and optimize the training of deep learning models. In  
 473     the subsequent training method, which separates the extended categories of five or  
 474     more sequences into the training set, verification set, and testing set at a ratio of 6:2:2,  
 475     any categories that are unsuitable for inclusion in these five sequences are included in  
 476     the training set.

### 477     **Construction of structured antibiotic resistance database (SARD)**

#### 478     *Core ARGs dataset*

479     To ensure the professionalism and accuracy of the training dataset, reference protein  
 480     sequences of ARGs defined by homologs in the authoritative CARD were selected as  
 481     core data for downstream model training. The sequences were clustered using CD-  
 482     HIT<sup>47</sup> (v4.8.1) at an amino acid sequence identity of 100%, and all protein sequences  
 483     and their ontological information were manually checked to ensure that each ARG  
 484     was properly classified into class (type) and group (subtype) based on their

485 ontological information. Generally, class is equivalent to CARD's ontology terms for  
 486 antibiotic drug types, and group is equivalent to the specific sequence category.  
 487 Macrolides, lincosamides, and streptogramins were combined into the MLS class.  
 488 Based on the above procedures, a core dataset of 2972 non-redundant sequences  
 489 representing 2972 groups of ARGs from 19 classes was obtained and used to build the  
 490 SARD, which was used in subsequent analyses.

#### 491 *Expanded ARGs dataset*

492 To ensure sufficient training data, the core dataset was expanded by retrieving close  
 493 homologues of its ARGs from the Uniref100 database following strict screening  
 494 criteria. Briefly, Diamond<sup>6</sup> (version 2.0.15) was used to index the ARG sequences in  
 495 the core dataset and to search for homologous sequences with an amino acid identity  
 496 and coverage greater than or equal to 80%. The extracted candidate sequences were  
 497 dereplicated and used as expanded datasets.

#### 498 *Negative dataset*

499 To ensure that the model can learn sufficient features of non-target gene function,  
 500 which is essential for robustly predicting target function directly from metagenomic  
 501 data, we used the Swiss-Prot database, an expert-validated protein database, to  
 502 generate a negative dataset for use as a non-ARG training set. First, protein sequences  
 503 associated with antibiotic resistance in the Swiss-Prot database were screened out  
 504 using the keywords KW-0046. The remaining sequences were aligned against the core  
 505 ARGs dataset using Diamond software. Sequences with an alignment coverage



greater than 80% were extracted and categorized into four negative datasets based on their sequence alignment identity (ID): identity 0 ( $ID \leq 0\%$ ), identity 30 ( $ID \leq 30\%$ ), identity 50 ( $ID \leq 50\%$ ), and identity 80 ( $ID \leq 80\%$ ).

## Construction of structured virulence factor database (SVFD)

### *Core VFGs dataset*

Virulence factor databases were collected from VFNet<sup>40</sup>. Zheng et al<sup>40</sup> performed a detailed similarity search for known and potential VFGs in the complete bacterial genome downloaded from the NCBI server using VFanalyzer<sup>48</sup>, with Virulence Factor Database (VFDB) as the core database<sup>48</sup>. VFNet is an expanded virulence factor database that can be used directly in the training process.

### *Negative dataset*

The non-VFG collection process is similar to that of the non-ARG collection process, except that KW-0800 is used to filter sequences from Swiss-Prot database (version: June 2021).

## Architecture of the FunGeneTyper model

FunGeneTyper is a universal function classification framework composed of two core deep learning models, FunTrans and FunRep, which share similar structures but are designed to classify functional genes at the type and subtype levels, respectively. Both models are modular adapter-based architectures that leverage a few extra parameters to achieve efficient fine-tuning of large-scale PLMs. In detail, utilizing the state-of-

the-art large-scale protein PLM esm-1b as a 33-layer transformer encoder framework as the foundation, we plug adapters in each transformer layer of the PLM, which are individual modular units that are used as newly introduced weights to be fine-tuned for specific functional tasks. Notably, ESM-1b, through self-supervised learning on the UniRef50 dataset, was shown to have a superior capacity to infer fundamental structural and functional characteristics of proteins from gene sequences<sup>49</sup>.

The holistic architecture is depicted in Fig. 1a and consists of three main components: a multi-headed self-attention, a feed-forward network, and an adapter layer. Each sublayer contains layer normalization and skip connections to effectively train the neural network and avoid overfitting. It is worth noting that the bottleneck-shaped adapter module consists of a down-project linear  $H \in \mathbb{R}^{d \times k}$  where  $d$  is embedding size of the Transformer model,  $k$  is the dimension of the adapter and  $d \gg k$ , a ReLU activation followed by an up-projection  $L \in \mathbb{R}^{k \times d}$ . The adapter layer is formulated as follows:

$$O_l = \text{LayerNorm}(T_l)$$

$$\text{Adapter}_l = L_l(\text{ReLU}(H_l(O_l))) + T_l$$

where  $T_l$  is the hidden feature at transformer layer  $l$ ,  $d = 1280$ , and  $k = 256$  in the actual training.

Following the approach of BERT<sup>50</sup>, hidden features from the first token of the sequence of the last layer are extracted. In contrast to FunTrans, which adds a nonlinear layer for protein function classification after the representations of the last

layer, FunRep first computes the hidden features of experimentally-confirmed core sequences and then annotates PCGs by finding the sequence's category with the closest Euclidean distance in the representation space.

Here, we use a dual-tower architecture with shared parameters similar to Sentence-BERT<sup>51</sup> for model training in order to place sequences with the same category closer in the representation space. FunRep is trained by constructing  $\langle A, P, N \rangle$  triples, where  $A$  is the anchor sequence,  $P$  is a positive example possessing the same category as  $A$ , and  $N$  is a negative example whose category is different from  $A$  and the hidden representations they obtained through FunRep are  $a, p$ , and  $n$ , respectively. The loss function adopts Triplet Loss, which is defined as follows:

$$Loss(a, p, n) = \max(D(a, p) - D(a, n)) + margin, 0)$$

where  $D$  is the Euclidean distance between vectors, and  $margin$  is an adjustable threshold, set to 1.0 during model training. ARGTyper-FunRep and VFGTyper-FunRep are classified at the group level with the same 21.76M learnable training parameters.

## Training settings

All datasets are divided into training, validation and testing in a 6:2:2 ratio, and the five-fold cross-validation is performed. Adam optimizer with default parameters is used, dropout is set to 0.2, learning rate is  $1e-5$ , and the early stopping method is adopted to prevent overfitting. The accuracy, precision, recall and F1-score are used to

564 evaluate the performance. As a result, the micro average of the F1-score also equals  
 565 that of precision and recall, as well as the overall accuracy. Thus, we report only the  
 566 overall accuracy for the micro average metrics while reporting precision, recall and  
 567 F1-score for the macro average metrics.

## 568 **Evaluation of FunGeneTyper for the discovery of new functional genes**

569 To validate the capacity of FunGeneTyper models in discovering new functional  
 570 genes, experimentally confirmed ARGs from functional metagenomics studies were  
 571 retrieved from NCBI's protein database (accession numbers in Dataset S8). After  
 572 removing those ARGs showing perfect sequence match to the CARD database (or  
 573 core dataset of ARGs), 297 experimentally confirmed ARG sequences of human gut<sup>35</sup>  
 574 (n = 168), WWTPs<sup>11</sup> (n = 77), and soil<sup>36-39</sup> (n = 52) bacteria were retained for use in  
 575 the downstream comparisons between FunGeneTyper and the well-established SA-  
 576 based (RGI<sup>7</sup>), HMM-based (Resfams<sup>18</sup>), and DL-based (DeepARG<sup>9</sup> and HMD-ARG<sup>32</sup>)  
 577 approaches in terms of classification performance of the new ARGs. In this study,  
 578 four evaluation metrics including the accuracy, precision, recall and F1-score were  
 579 computed to assess the multi-classification results performance using the following  
 580 equations:

$$Accuracy = \frac{TP + TN}{TP + FP + FN + TN}$$

$$Precision = \frac{TP}{TP + FP}$$

$$Recall = \frac{TP}{TP + FN}$$

$$F1\ Score = \frac{2 * Precision * Recall}{Precision + Recall}$$

581 where TP is the number of true positives, TN is the number of true negatives, FP is the  
582 number of false positives, and FN is the number of false negatives.

583 To compare the ability of FunGeneTyper for discovering new VFGs, BoNTs-like  
584 sequences from the genome of *Chryseobacterium piperi* reported in a prior study<sup>41</sup>  
585 was downloaded from NCBI's database by accession number (Dataset S7). Then,  
586 VFGTyper was used to predict VFGs and their affiliated family from the BoNTs-like  
587 sequences, and the output results were compared with those by a conventional  
588 sequence alignment-based approach with Diamond<sup>6</sup> (version 2.0.15) search of the  
589 BoNTs-like sequences against SVFD.

## 590 **Abbreviations**

591 DL: Deep Learning  
592 SFGD: Structured Functional Gene Dataset  
593 PCG: Protein-Coding Gene  
594 ARG: Antibiotic Resistance Gene  
595 VFG: Virulence Factor Gene  
596 MLS: Macrolides, Lincosamides and Streptogramins

## 597 **Author Contributions**

598 F. Ju conceived the FunGeneTyper framework idea, obtained funding, and supervised  
599 the project. F. Yuan designed the Adapter sharing mechanism. G. Zhang and H. Wang

(visiting student from Northeastern University) performed the model construction, data analysis and visualization. F. Ju and F. Yuan co-supervised G. Zhang and H. Wang on the deep-learning model construction with additional support from G. Guo. G. Zhang built the structured databases and accomplished data presentation with the assistance from J. Yang, Z. Zhang, L. Zhang. F. Ju and G. Zhang co-wrote the manuscript with assistance from F. Yuan and H. Wang. J. All authors approved the final version of the manuscript.

## **Funding**

This work was supported by Zhejiang Provincial Natural Science Foundation of China (grant no. LR22D010001), National Natural Science Foundation of China (22241603), and Research Center for Industries of the Future at Westlake University (grant no. WU2022C030).

## **Acknowledgement**

The authors would like to thank Xinyu Huang and Lingrong Jin for valuable discussion.

We thank Yisong Xu for her professional support in lab management. We thank the Westlake University High-Performance Computing Center for computation support.

We thank Kangyong Hu, Ling Yang, and Hang Li for their support of server maintenance.

## 619 Reference

- 620 1 Ju, F. *et al.* Wastewater treatment plant resistomes are shaped by bacterial  
621 composition, genetic exchange, and upregulated expression in the effluent  
622 microbiomes. *ISME J* **13**, 346-360 (2019). [https://doi.org/10.1038/s41396-](https://doi.org/10.1038/s41396-018-0277-8)  
623 [018-0277-8](https://doi.org/10.1038/s41396-018-0277-8)
- 624 2 Pasolli, E. *et al.* Extensive Unexplored Human Microbiome Diversity  
625 Revealed by Over 150,000 Genomes from Metagenomes Spanning Age,  
626 Geography, and Lifestyle. *Cell* **176**, 649-662 e620 (2019).  
627 <https://doi.org/10.1016/j.cell.2019.01.001>
- 628 3 Nayfach, S. *et al.* A genomic catalog of Earth's microbiomes. *Nat Biotechnol*  
629 **39**, 499-509 (2021). <https://doi.org/10.1038/s41587-020-0718-6>
- 630 4 Altschul, S. F., Gish, W., Miller, W., Myers, E. W. & Lipman, D. J. Basic local  
631 alignment search tool. *Journal of Molecular Biology* **215**, 403-410 (1990).  
632 [https://doi.org/10.1016/s0022-2836\(05\)80360-2](https://doi.org/10.1016/s0022-2836(05)80360-2)
- 633 5 Edgar, R. C. Search and clustering orders of magnitude faster than BLAST.  
634 *Bioinformatics* **26**, 2460-2461 (2010).
- 635 6 Buchfink, B., Xie, C. & Huson, D. H. Fast and sensitive protein alignment  
636 using DIAMOND. *Nat Methods* **12**, 59-60 (2015).  
637 <https://doi.org/10.1038/nmeth.3176>
- 638 7 Alcock, B. P. *et al.* CARD 2020: antibiotic resistome surveillance with the  
639 comprehensive antibiotic resistance database. *Nucleic Acids Res* **48**, D517-  
640 D525 (2020). <https://doi.org/10.1093/nar/gkz935>
- 641 8 Yang, Y. *et al.* ARGs-OAP: online analysis pipeline for antibiotic resistance  
642 genes detection from metagenomic data using an integrated structured ARG-  
643 database. *Bioinformatics* **32**, 2346-2351 (2016).  
644 <https://doi.org/10.1093/bioinformatics/btw136>
- 645 9 Arango-Argoty, G. *et al.* DeepARG: a deep learning approach for predicting  
646 antibiotic resistance genes from metagenomic data. *Microbiome* **6**, 23 (2018).  
647 <https://doi.org/10.1186/s40168-018-0401-z>
- 648 10 de Nies, L. *et al.* PathoFact: a pipeline for the prediction of virulence factors  
649 and antimicrobial resistance genes in metagenomic data. *Microbiome* **9**, 49  
650 (2021). <https://doi.org/10.1186/s40168-020-00993-9>
- 651 11 Munck, C. *et al.* Limited dissemination of the wastewater treatment plant core  
652 resistome. *Nat Commun* **6**, 8452 (2015). <https://doi.org/10.1038/ncomms9452>
- 653 12 Forsberg, K. J. *et al.* Bacterial phylogeny structures soil resistomes across  
654 habitats. *Nature* **509**, 612-616 (2014). <https://doi.org/10.1038/nature13377>
- 655 13 Díaz Rodríguez, C. A. *et al.* Novel bacterial taxa in a minimal lignocellulolytic  
656 consortium and their potential for lignin and plastics transformation. *ISME*  
657 *Communications* **2** (2022). <https://doi.org/10.1038/s43705-022-00176-7>
- 658 14 Royo-Llonch, M. *et al.* Compendium of 530 metagenome-assembled bacterial  
659 and archaeal genomes from the polar Arctic Ocean. *Nat Microbiol* **6**, 1561-

- 1574 (2021). <https://doi.org/10.1038/s41564-021-00979-9>
- 15 Feldgarden, M. *et al.* Validating the AMRFinder Tool and Resistance Gene Database by Using Antimicrobial Resistance Genotype-Phenotype Correlations in a Collection of Isolates. *Antimicrob Agents Chemother* **63** (2019). <https://doi.org/10.1128/AAC.00483-19>
- 16 Xie, G. & Fair, J. M. Hidden Markov Model: a shortest unique representative approach to detect the protein toxins, virulence factors and antibiotic resistance genes. *BMC Res Notes* **14**, 122 (2021). <https://doi.org/10.1186/s13104-021-05531-w>
- 17 Boolchandani, M., D'Souza, A. W. & Dantas, G. Sequencing-based methods and resources to study antimicrobial resistance. *Nat Rev Genet* **20**, 356-370 (2019). <https://doi.org/10.1038/s41576-019-0108-4>
- 18 Gibson, M. K., Forsberg, K. J. & Dantas, G. Improved annotation of antibiotic resistance determinants reveals microbial resistomes cluster by ecology. *ISME J* **9**, 207-216 (2015). <https://doi.org/10.1038/ismej.2014.106>
- 19 Biswas, S., Khimulya, G., Alley, E. C., Esvelt, K. M. & Church, G. M. Low-N protein engineering with data-efficient deep learning. *Nat Methods* **18**, 389-396 (2021). <https://doi.org/10.1038/s41592-021-01100-y>
- 20 Ma, Y. *et al.* Identification of antimicrobial peptides from the human gut microbiome using deep learning. *Nat Biotechnol* (2022). <https://doi.org/10.1038/s41587-022-01226-0>
- 21 Alley, E. C., Khimulya, G., Biswas, S., AlQuraishi, M. & Church, G. M. Unified rational protein engineering with sequence-based deep representation learning. *Nat Methods* **16**, 1315-1322 (2019). <https://doi.org/10.1038/s41592-019-0598-1>
- 22 Rives, A. *et al.* Biological structure and function emerge from scaling unsupervised learning to 250 million protein sequences. *Proc Natl Acad Sci U S A* **118** (2021). <https://doi.org/10.1073/pnas.2016239118>
- 23 Ofer, D., Brandes, N. & Linial, M. The language of proteins: NLP, machine learning & protein sequences. *Comput Struct Biotechnol J* **19**, 1750-1758 (2021). <https://doi.org/10.1016/j.csbj.2021.03.022>
- 24 Unsal, S. *et al.* Learning functional properties of proteins with language models. *Nature Machine Intelligence* **4**, 227-245 (2022). <https://doi.org/10.1038/s42256-022-00457-9>
- 25 Bileschi, M. L. *et al.* Using deep learning to annotate the protein universe. *Nat Biotechnol* (2022). <https://doi.org/10.1038/s41587-021-01179-w>
- 26 Dohan, D., Gane, A., Bileschi, M. L., Belanger, D. & Colwell, L. Improving Protein Function Annotation via Unsupervised Pre-training: Robustness, Efficiency, and Insights. *Proceedings of the 27th ACM SIGKDD Conference on Knowledge Discovery & Data Mining*. 2782-2791 (Association for Computing Machinery).
- 27 Yuan, F., He, X., Karatzoglou, A. & Zhang, L. Parameter-Efficient Transfer



702 from Sequential Behaviors for User Modeling and  
703 Recommendation. *Proceedings of the 43rd International ACM SIGIR*  
704 *Conference on Research and Development in Information Retrieval*. 1469-  
705 1478.

706 28 Houlsby, N. *et al.* Parameter-Efficient Transfer Learning for NLP. *Proceedings*  
707 *of the 36th International Conference on Machine Learning*. (eds Chaudhuri  
708 Kamalika & Salakhutdinov Ruslan) 2790--2799 (PMLR).

709 29 Murray, C. J. L. *et al.* Global burden of bacterial antimicrobial resistance in  
710 2019: a systematic analysis. *The Lancet* **399**, 629-655 (2022).  
711 [https://doi.org/10.1016/s0140-6736\(21\)02724-0](https://doi.org/10.1016/s0140-6736(21)02724-0)

712 30 Du, D. *et al.* Multidrug efflux pumps: structure, function and regulation. *Nat*  
713 *Rev Microbiol* **16**, 523-539 (2018). <https://doi.org/10.1038/s41579-018-0048-6>

714 31 Piddock, L. J. Clinically relevant chromosomally encoded multidrug  
715 resistance efflux pumps in bacteria. *Clin Microbiol Rev* **19**, 382-402 (2006).  
716 <https://doi.org/10.1128/CMR.19.2.382-402.2006>

717 32 Li, Y. *et al.* HMD-ARG: hierarchical multi-task deep learning for annotating  
718 antibiotic resistance genes. *Microbiome* **9**, 40 (2021).  
719 <https://doi.org/10.1186/s40168-021-01002-3>

720 33 Rost, B. Twilight zone of protein sequence alignments. *Protein Eng* **12**, 85-94  
721 (1999). <https://doi.org/10.1093/protein/12.2.85>

722 34 Bepler, T. & Berger, B. Learning the protein language: Evolution, structure,  
723 and function. *Cell Syst* **12**, 654-669 e653 (2021).  
724 <https://doi.org/10.1016/j.cels.2021.05.017>

725 35 Sommer, M. O. A., Dantas, G. & Church, G. M. Functional characterization of  
726 the antibiotic resistance reservoir in the human microflora. *Science* **325**, 1128-  
727 1131 (2009). <https://doi.org/10.1126/science.1176950>

728 36 Willms, I. M. *et al.* Novel Soil-Derived Beta-Lactam, Chloramphenicol,  
729 Fosfomycin and Trimethoprim Resistance Genes Revealed by Functional  
730 Metagenomics. *Antibiotics (Basel)* **10** (2021).  
731 <https://doi.org/10.3390/antibiotics10040378>

732 37 Wang, S. *et al.* Tetracycline Resistance Genes Identified from Distinct Soil  
733 Environments in China by Functional Metagenomics. *Front Microbiol* **8**, 1406  
734 (2017). <https://doi.org/10.3389/fmicb.2017.01406>

735 38 Allen, H. K., Moe, L. A., Rodbumrer, J., Gaarder, A. & Handelsman, J.  
736 Functional metagenomics reveals diverse beta-lactamases in a remote Alaskan  
737 soil. *ISME J* **3**, 243-251 (2009). <https://doi.org/10.1038/ismej.2008.86>

738 39 Donato, J. J. *et al.* Metagenomic analysis of apple orchard soil reveals  
739 antibiotic resistance genes encoding predicted bifunctional proteins. *Appl*  
740 *Environ Microbiol* **76**, 4396-4401 (2010). <https://doi.org/10.1128/AEM.01763-09>

741  
742 40 Zheng, D., Pang, G., Liu, B., Chen, L. & Yang, J. Learning transferable deep  
743 convolutional neural networks for the classification of bacterial virulence

744 factors. *Bioinformatics* **36**, 3693-3702 (2020).  
745 <https://doi.org/10.1093/bioinformatics/btaa230>  
746 41 Mansfield, M. J. *et al.* Bioinformatic discovery of a toxin family in  
747 *Chryseobacterium piperi* with sequence similarity to botulinum neurotoxins.  
748 *Sci Rep* **9**, 1634 (2019). <https://doi.org/10.1038/s41598-018-37647-8>  
749 42 WHO, O. One health. *World Health Organization* (2017).  
750 43 Wang, Z. *et al.* ARG-SHINE: improve antibiotic resistance class prediction by  
751 integrating sequence homology, functional information and deep convolutional  
752 neural network. *NAR Genom Bioinform* **3**, lqab066 (2021).  
753 <https://doi.org/10.1093/nargab/lqab066>  
754 44 Chen, P., Ye, J., Chen, G., Zhao, J. & Heng, P.-A. Robustness of accuracy  
755 metric and its inspirations in learning with noisy labels. *Proceedings of the*  
756 *AAAI Conference on Artificial Intelligence*. 11451-11461.  
757 45 Fish, J. A. *et al.* FunGene: the functional gene pipeline and repository. *Front*  
758 *Microbiol* **4**, 291 (2013). <https://doi.org/10.3389/fmicb.2013.00291>  
759 46 Lee, E. D., Aurand, E. R., Friedman, D. C. & Engineering Biology Research  
760 Consortium Microbiomes Roadmapping Working, G. Engineering  
761 Microbiomes-Looking Ahead. *ACS Synth Biol* **9**, 3181-3183 (2020).  
762 <https://doi.org/10.1021/acssynbio.0c00558>  
763 47 Li, W. & Godzik, A. Cd-hit: a fast program for clustering and comparing large  
764 sets of protein or nucleotide sequences. *Bioinformatics* **22**, 1658-1659 (2006).  
765 <https://doi.org/10.1093/bioinformatics/btl158>  
766 48 Liu, B., Zheng, D., Jin, Q., Chen, L. & Yang, J. VFDB 2019: a comparative  
767 pathogenomic platform with an interactive web interface. *Nucleic Acids Res*  
768 **47**, D687-D692 (2019). <https://doi.org/10.1093/nar/gky1080>  
769 49 Rao, R., Meier, J., Sercu, T., Ovchinnikov, S. & Rives, A. Transformer protein  
770 language models are unsupervised structure learners. *bioRxiv*,  
771 2020.2012.2015.422761 (2020). <https://doi.org/10.1101/2020.12.15.422761>  
772 50 Devlin, J., Chang, M.-W., Lee, K. & Toutanova, K. BERT: Pre-training of  
773 Deep Bidirectional Transformers for Language Understanding. 4171-4186  
774 (2019). <https://doi.org/10.18653/v1/N19-1423>  
775 51 Reimers, N. & Gurevych, I. Sentence-BERT: Sentence Embeddings using  
776 Siamese BERT-Networks. *Proceedings of the 2019 Conference on Empirical*  
777 *Methods in Natural Language Processing and the 9th International Joint*  
778 *Conference on Natural Language Processing (EMNLP-IJCNLP)*. 3982-3992.  
779

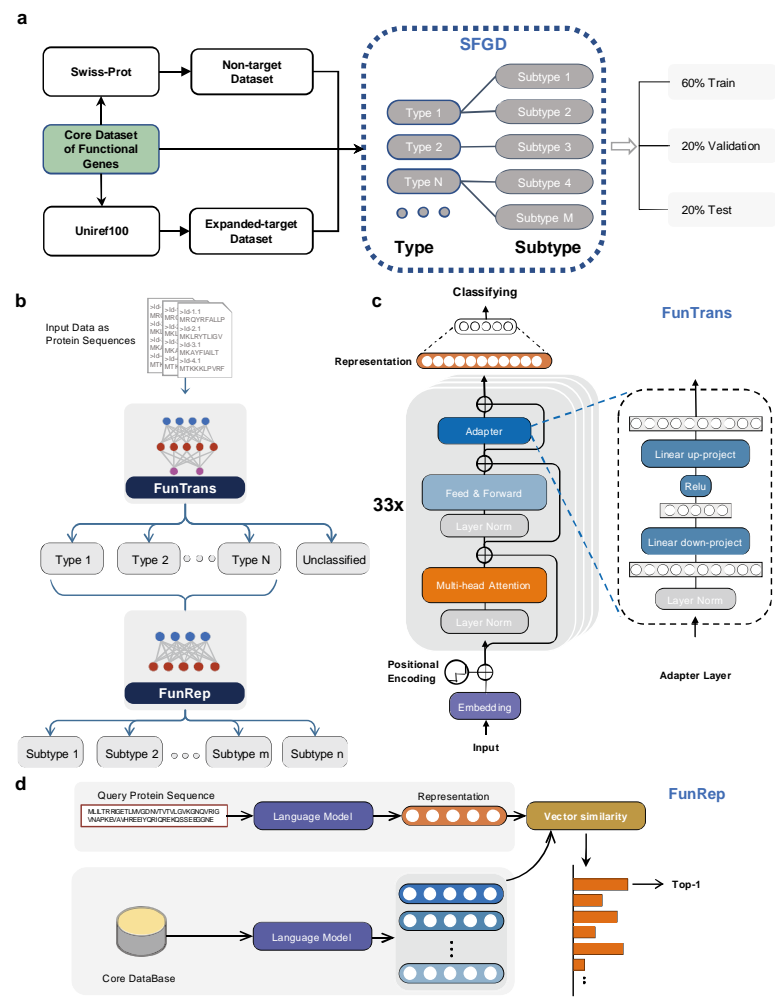

780

781 **Fig. 1** FunGeneTyper model design and database construction workflows. **a**, Process  
782 of preparing a structured functional gene dataset (SFGD). The data set is divided into  
783 the training set, validation set and testing set in a 6:2:2 ratio. **b**, Two-level hierarchical  
784 structure of FunGeneTyper. **c**, Schematic representation of FunTrans model. **d**,  
785 Schematic representation of FunRep model.

786

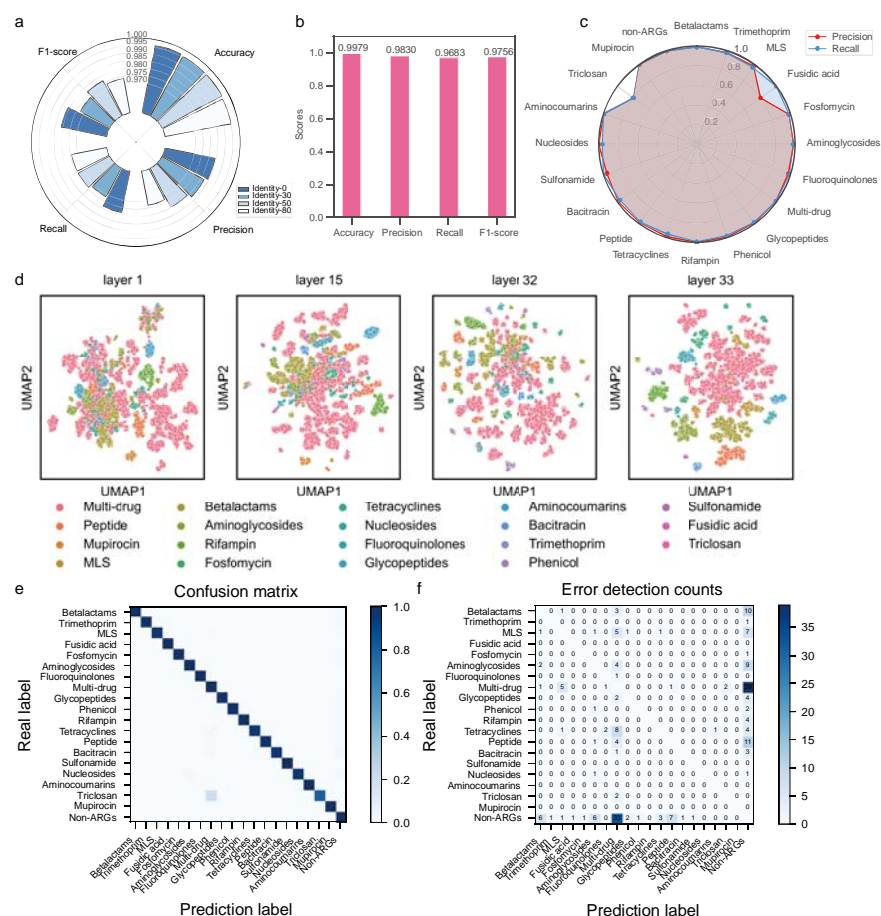

787

788 **Fig. 2. Performance evaluation of deep-learning FunGeneTyper models with**

789 **structured Antibiotic Resistance Gene Database (SARD) for classification of**

790 **ARGs. a**, Evaluation of the influence of identity threshold used for selecting the

791 negative dataset on model performance in the classification of ARGs. **b**, Performance

792 metrics of ARGTyper developed based on FunGeneTyper models and SARD. **c**,

793 Performance of all 19 classes as indicated by precision and recall of ARGs and non-

794 ARG classes. **d**, Visualization of feature learning at different layers during the

795 ARGTyper training process. **e**, Confusion matrix for ARG class classification,

796 confusion between true (y-axis) and predicted (x-axis) ARGs. **f**, Number of ARG

797 protein sequences annotated incorrectly. MLS: Macrolides, Lincosamides and

798 Streptogramins.

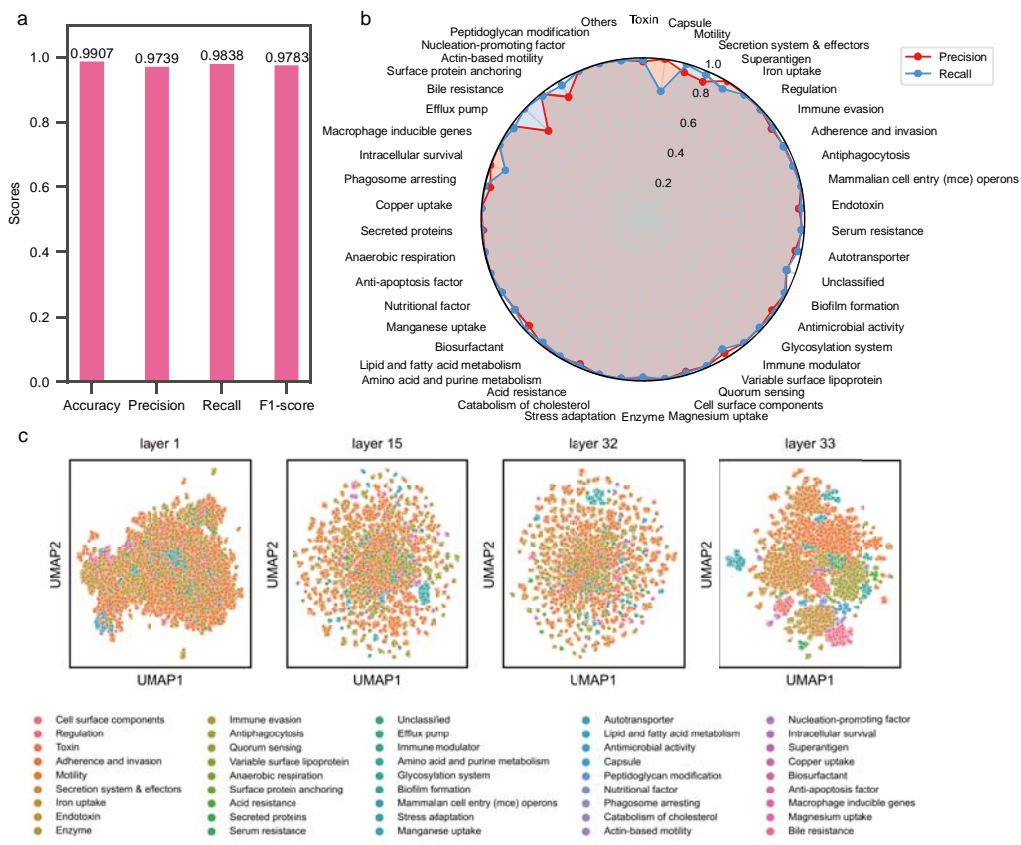

799

800 **Fig. 3. Transfer learning of FunGeneTyper models on Structured Virulence**  
801 **Factor Gene Database (VFGD) and performance evaluation for VFG**  
802 **classification.** **a**, Performance metrics of VFGTyper developed based on  
803 FunGeneTyper models and VFGD. **b**, Precision and Recall of VFGs family and non-  
804 VFGs category. **c**, Visualization of feature learning at different layers in VFGs  
805 FunTrans training. VFGs: virulence factor genes.  
806

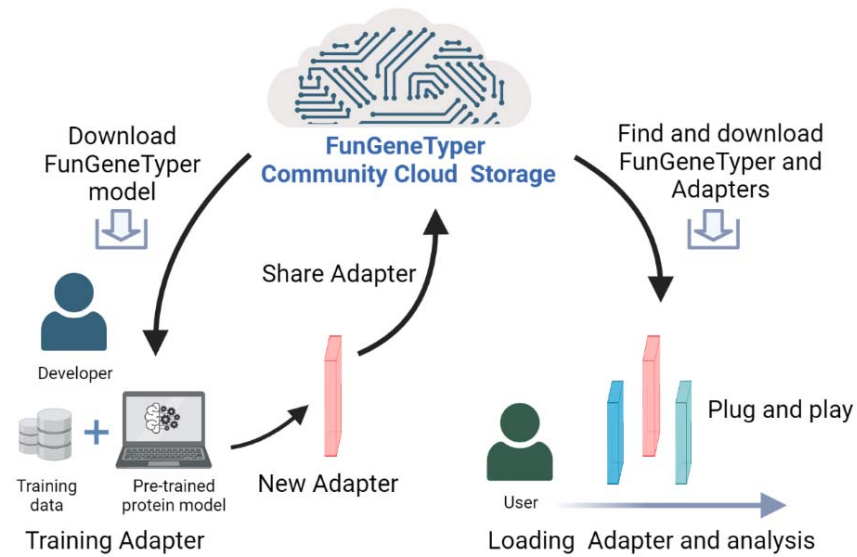

807

808 **Fig. 4. Schematic of the Adapter Sharing Community (ASC) in the framework of**

809 **FunGeneTyper.** The community developers are cyber de-centralized to train

810 customizable structured databases and develop deep learning classifiers of various

811 categories of functional genes, while users utilize the classifiers of interest to

812 accelerate the discovery of genes which, in turn, provide new experimentally-

813 confirmed sequences to expand the structured databases and improve deep-learning

814 models.

815

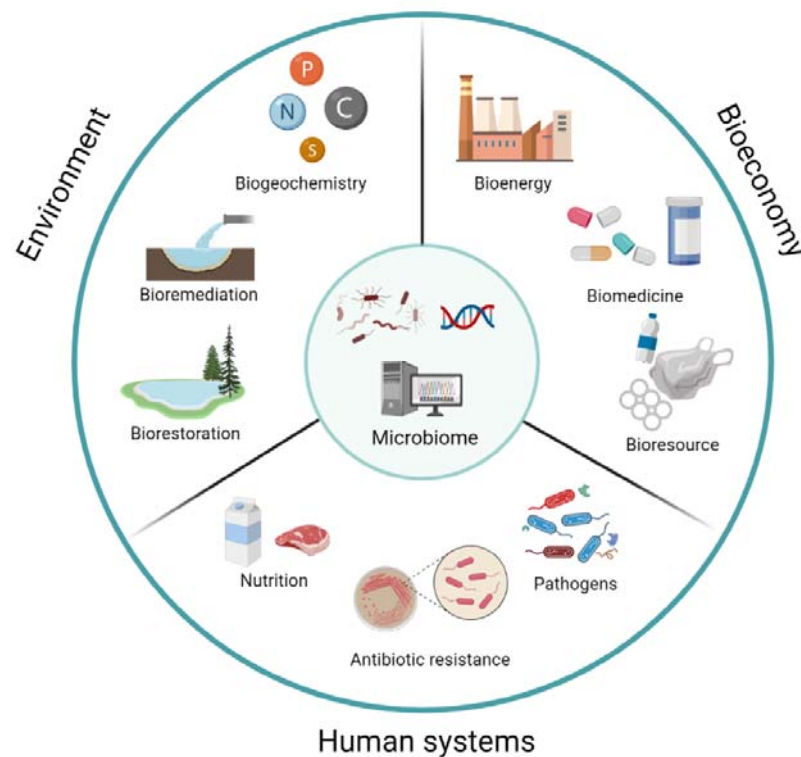

816

817 **Fig. 5. Potential applications of FunGeneTyper to the discovery of microbiome**  
 818 **resources for enhancing our environment, bioeconomy, and human systems.**

819 Metagenomic discovery of precious genetic and enzymatic resources facilitated by the

820 Adapter Sharing Community of FunGeneTyper can contribute to follow-up

821 microbiome, genetic and protein engineering researches for enhancing human health

822 and eco-environment systems.



**Table 1 Performance comparison between FunGeneTyper and other alternative bioinformatics tools for the discovery of experimentally confirmed new ARGs.** In total, 297 experimentally confirmed ARGs sequences of human gut<sup>35</sup> (n = 168), WWTPs<sup>11</sup> (n = 77), and soil<sup>36-39</sup> (n = 52) bacteria were included in the comparative analysis which was performed under the default settings of each deep-learning (DL)-based, sequence alignment (SA)-based or Hidden Markov Model (HMM)-based tool recommended by the developers.

| Tools                  | Human gut (n=168) |               |               |               | WWTP (n=77)   |               |               |               | Soil (n=52)   |               |               |               |
|------------------------|-------------------|---------------|---------------|---------------|---------------|---------------|---------------|---------------|---------------|---------------|---------------|---------------|
|                        | Accuracy          | Precision     | Recall        | F1-score      | Accuracy      | Precision     | Recall        | F1-score      | Accuracy      | Precision     | Recall        | F1-score      |
| <i>DL-based tools</i>  |                   |               |               |               |               |               |               |               |               |               |               |               |
| FunGeneTyper           | 0.8512            | <b>0.7500</b> | <b>0.6642</b> | <b>0.6948</b> | <b>0.7273</b> | <b>0.7500</b> | <b>0.5403</b> | <b>0.6072</b> | <b>0.8269</b> | 0.5926        | <b>0.5529</b> | <b>0.5445</b> |
| HMD-ARG                | 0.8452            | 0.6000        | 0.5230        | 0.5486        | 0.5714        | 0.7161        | 0.3877        | 0.4589        | 0.8077        | <b>0.6000</b> | 0.4560        | 0.5119        |
| DeepARG                | 0.3512            | 0.6250        | 0.4720        | 0.5149        | 0.1688        | 0.5714        | 0.1682        | 0.2591        | 0.2885        | 0.3750        | 0.1057        | 0.1607        |
| <i>SA-based tools</i>  |                   |               |               |               |               |               |               |               |               |               |               |               |
| RGI                    | 0.3452            | 0.6250        | 0.4596        | 0.5065        | 0.0390        | 0.3750        | 0.0349        | 0.0632        | 0.1538        | 0.1250        | 0.0357        | 0.0556        |
| <i>HMM-based tools</i> |                   |               |               |               |               |               |               |               |               |               |               |               |
| Resfams                | <b>0.8830</b>     | 0.4545        | 0.3968        | 0.4195        | 0.6234        | 0.6250        | 0.4736        | 0.5224        | 0.8088        | 0.2727        | 0.2545        | 0.2630        |
